# Supplementary material
Source: publisher figshare collection journal article supplement (https://tandf.figshare.com/articles/dataset/_/5729202)

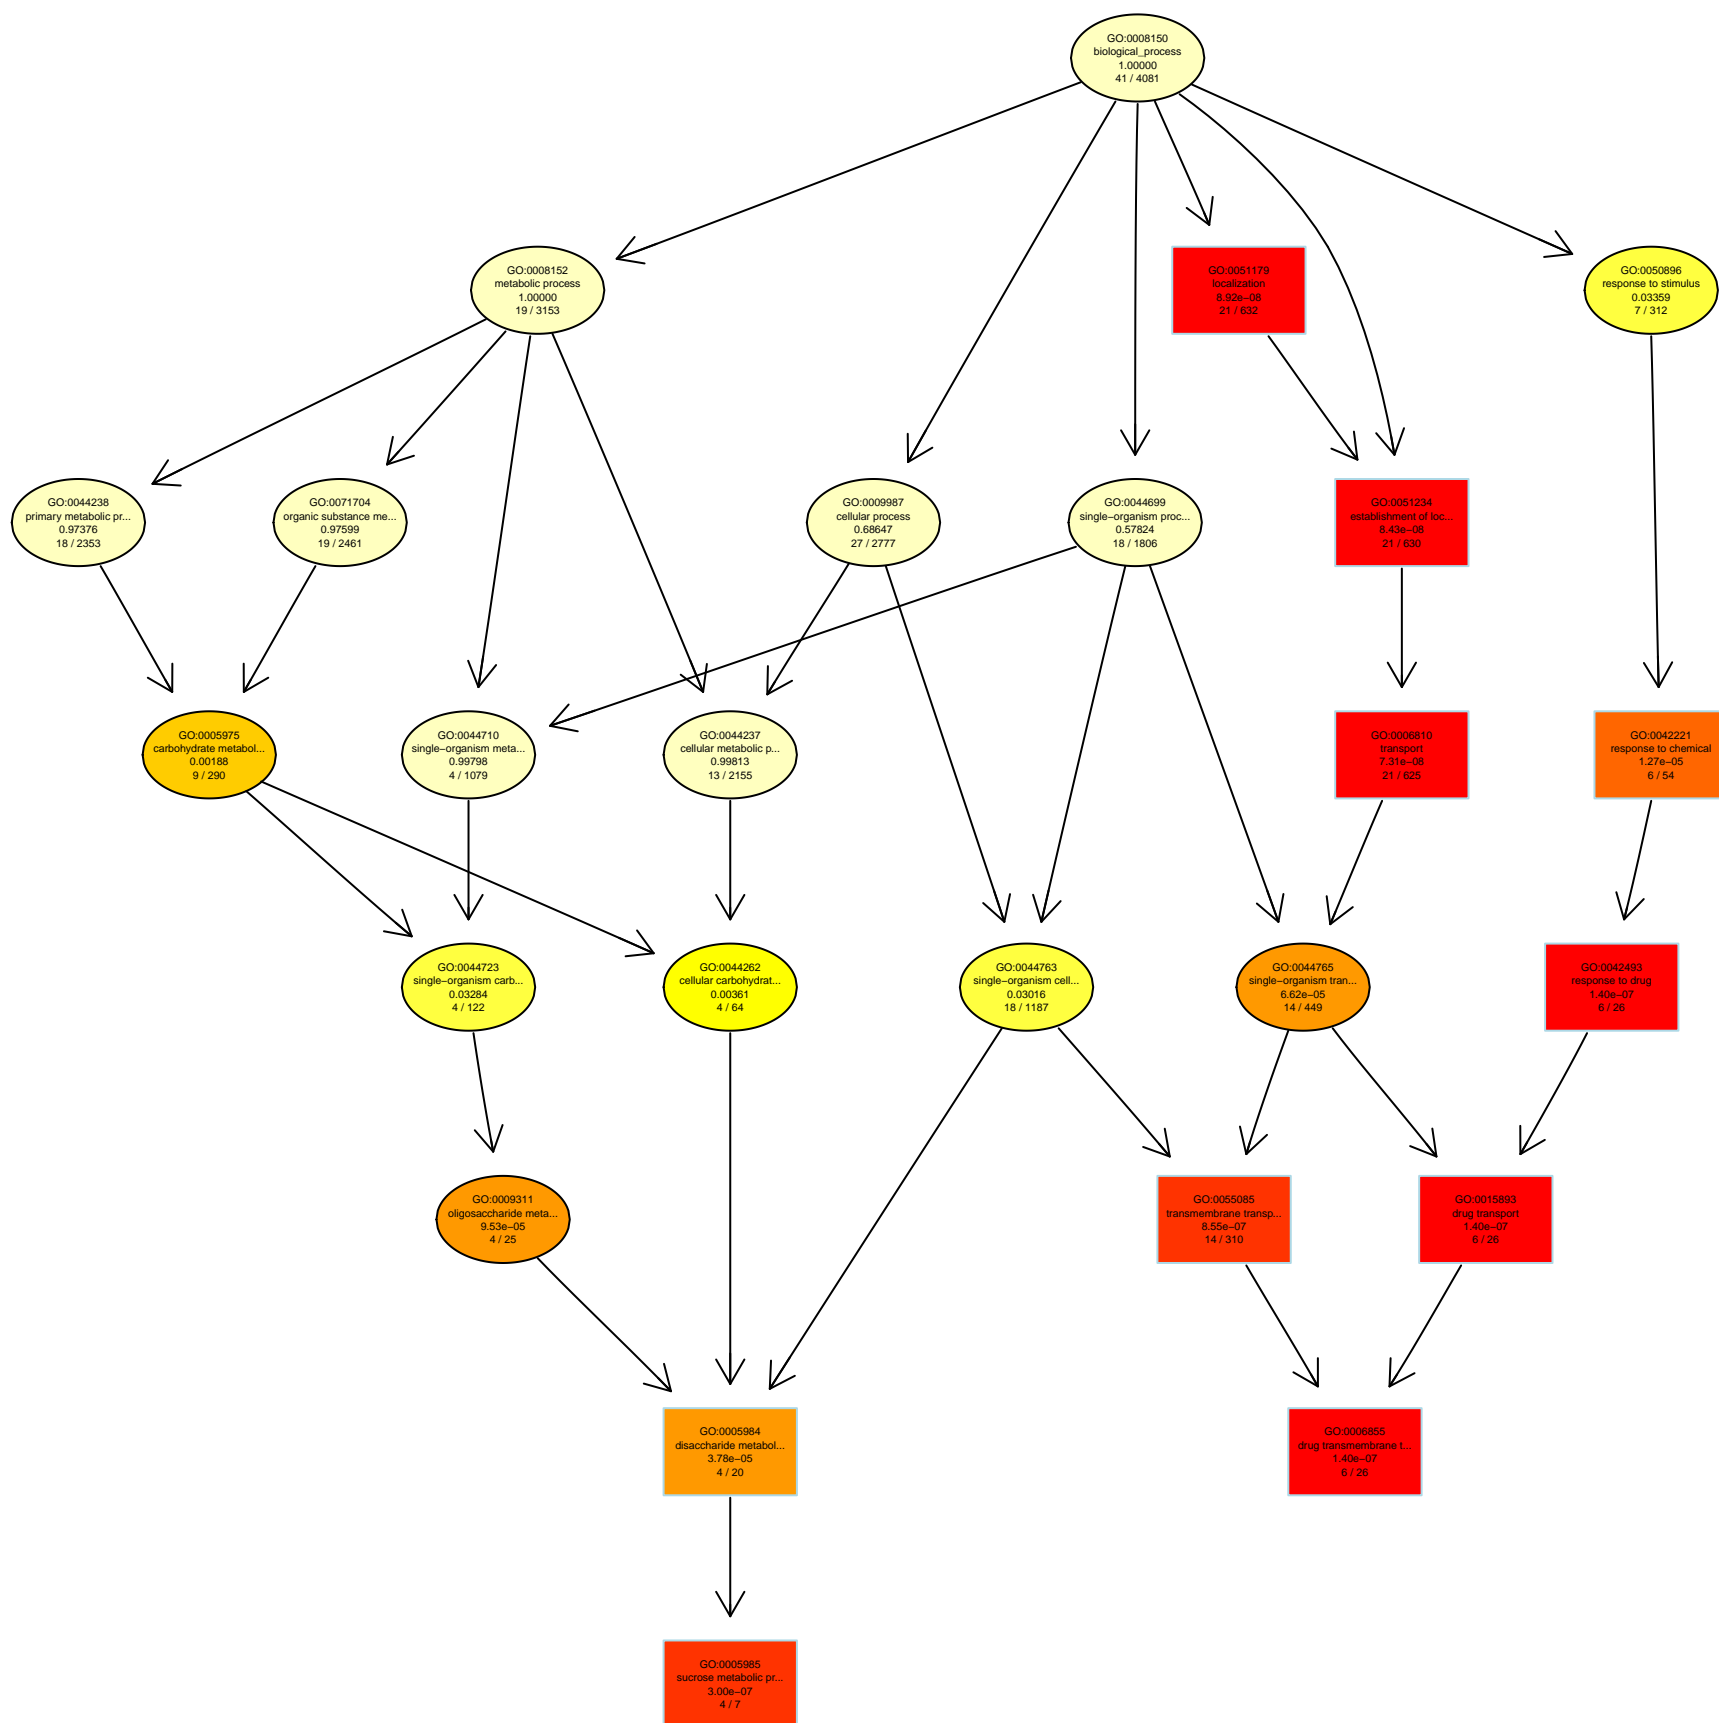

Figure S2. GO annotation analysis of genes involved in GRN modules SubModule69

Supplement: Supplementary file 1 [file 1]

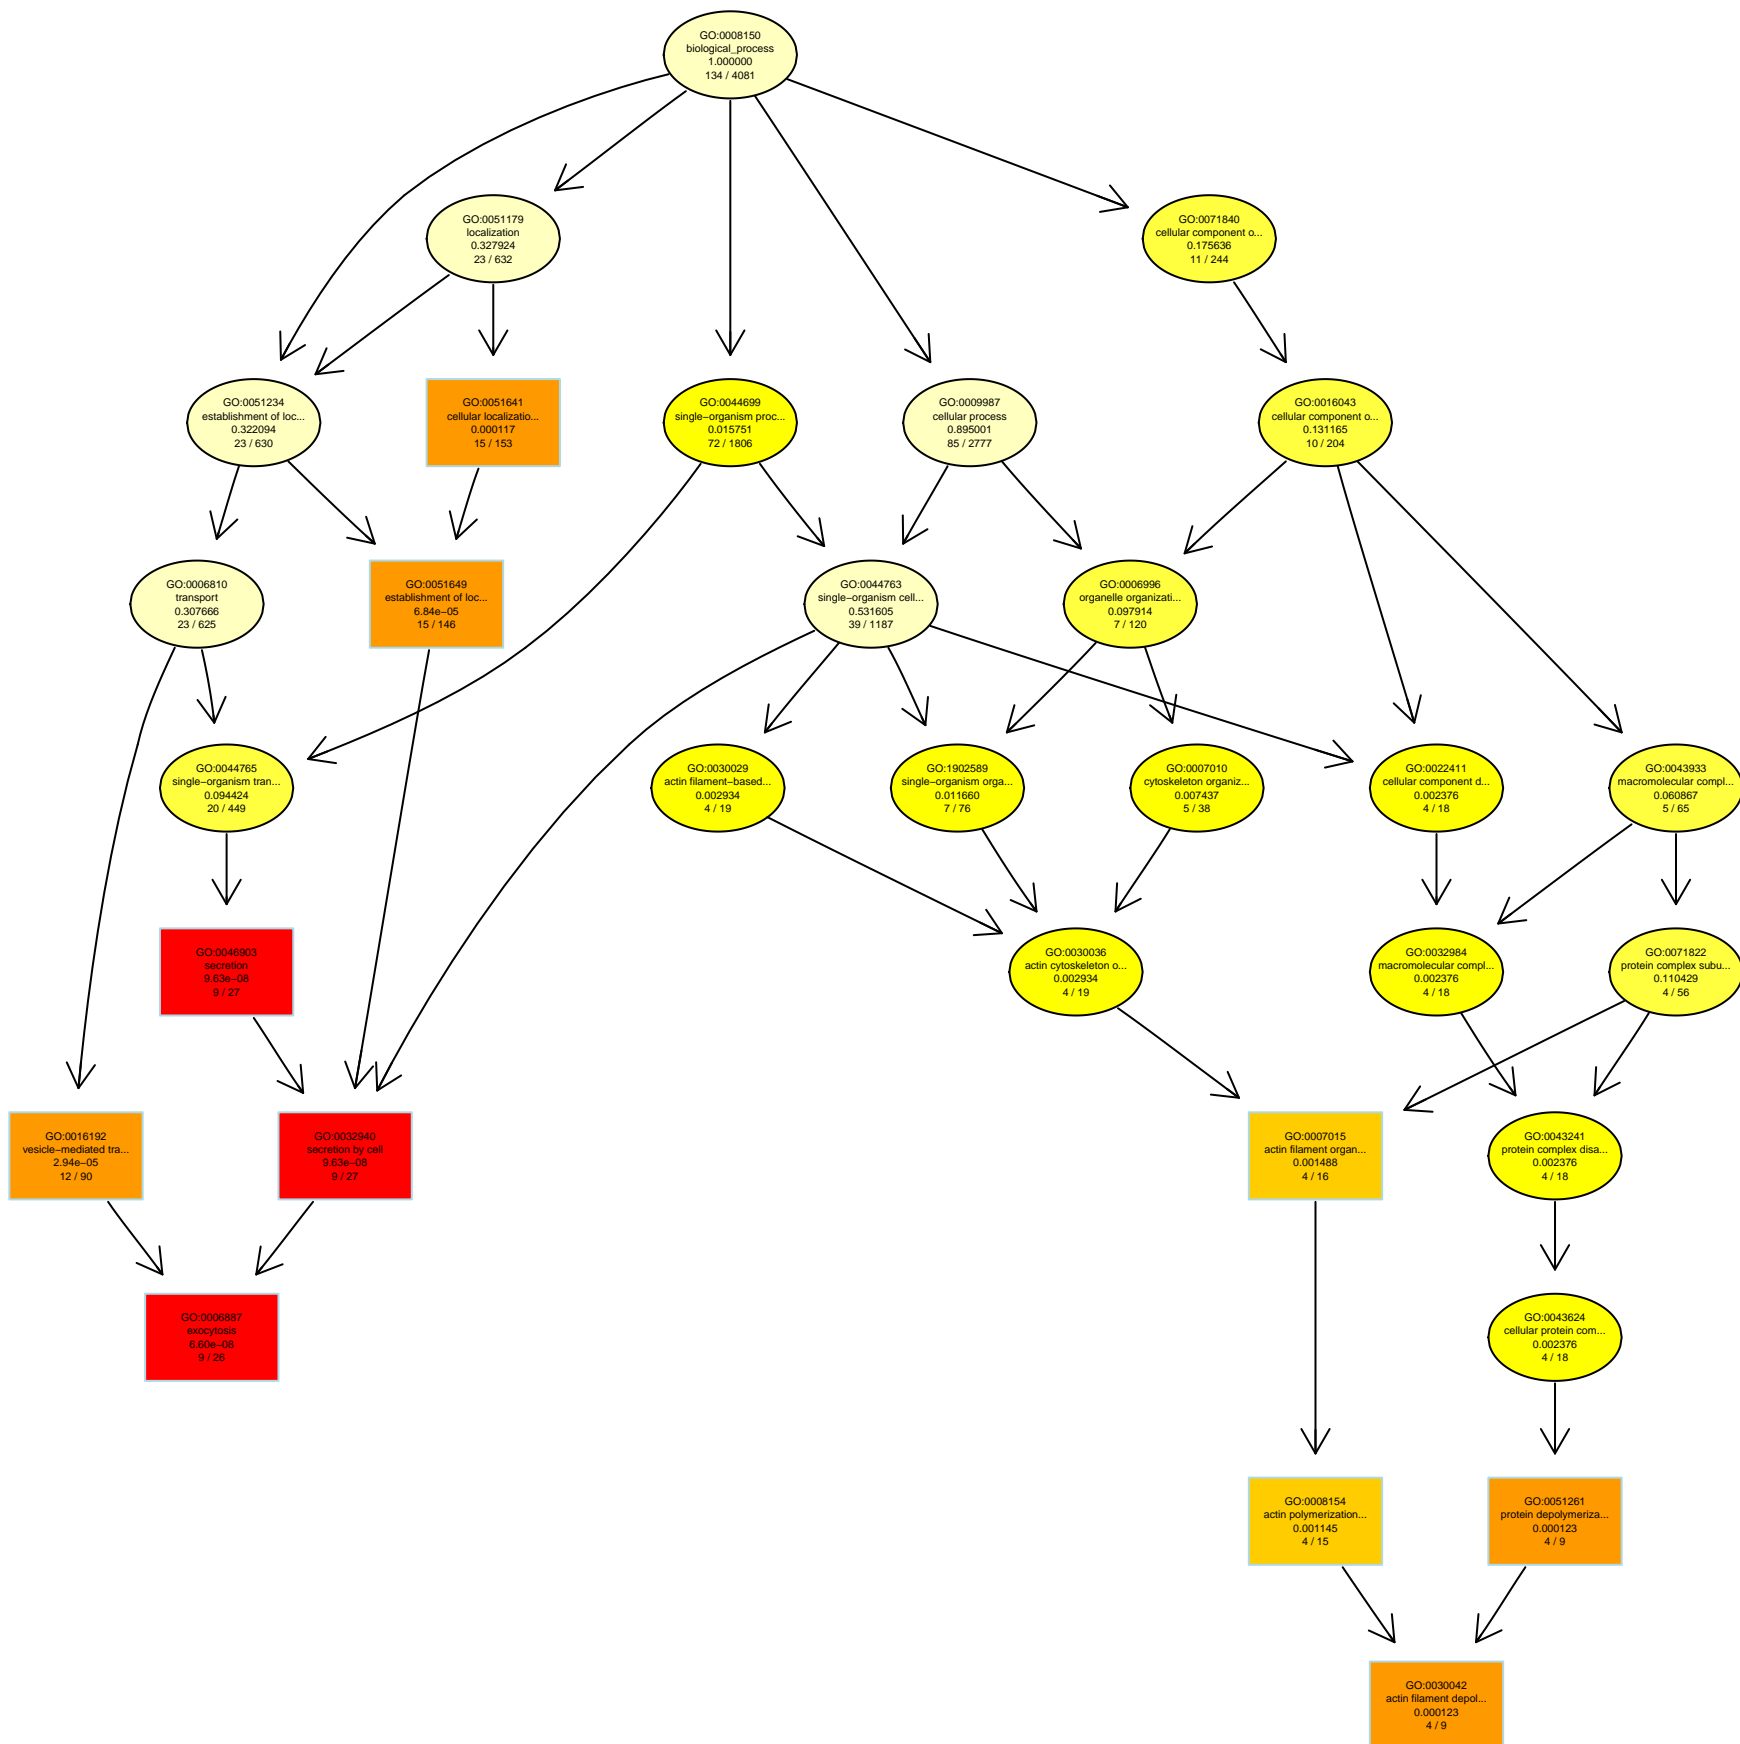

Figure S1. GO annotation analysis of genes involved in GRN modules SubModule08

Supplement: Supplementary file 2 [file 1]
